# Supplementary material for: A Randomized, Phase III Study of Lenvatinib in Chinese Patients with Radioiodine-Refractory Differentiated Thyroid Cancer
Source: PubMed Central journal article supplement — Clin Cancer Res. 2021 Jul 29;27(20):5502–9. doi: 10.1158/1078-0432.CCR-21-0761 (PMC9401493; doi:10.1158/1078-0432.ccr-21-0761), 2021-07-29
Supplement: 10780432ccr210761-sup-261465_3_supp_7253442_qw784k.pdf [file 10780432ccr210761-sup-261465_3_supp_7253442_qw784k.pdf]

## Supplementary Material

**Supplementary Table S1. Pathological subtypes**

| <b>Histology, <i>n</i> (%)</b> | <b>Lenvatinib (<i>n</i> = 103)</b> | <b>Placebo (<i>n</i> = 48)</b> | <b>Total (<i>N</i> = 151)</b> |
|--------------------------------|------------------------------------|--------------------------------|-------------------------------|
| Papillary                      | 83 (80.6)                          | 40 (83.3)                      | 123 (81.5)                    |
| Follicular variant             | 13 (12.6)                          | 5 (10.4)                       | 18 (11.9)                     |
| Other variants                 |                                    |                                |                               |
| Columnar cell                  | 2 (1.9)                            | 0                              | 2 (1.3)                       |
| Hürthle cell                   | 1 (1.0)                            | 2 (4.2)                        | 3 (2.0)                       |
| Poorly differentiated          | 2 (1.9)                            | 2 (4.2)                        | 4 (2.6)                       |
| Other                          | 0                                  | 2 (4.2)                        | 2 (1.3)                       |
| Unknown                        | 65 (63.1)                          | 29 (60.4)                      | 94 (62.3)                     |
| Follicular                     | 20 (19.4)                          | 8 (16.7)                       | 28 (18.5)                     |
| Hürthle cell                   | 1 (1.0)                            | 0                              | 1 (0.7)                       |
| Clear cell                     | 0                                  | 1 (2.1)                        | 1 (0.7)                       |
| Other                          | 1 (1.0)                            | 0                              | 1 (0.7)                       |
| Unknown                        | 18 (17.5)                          | 7 (14.6)                       | 25 (16.6)                     |

**Supplementary Figure S1. Forest plot of PFS hazard ratios for lenvatinib versus placebo (by IIR using RECIST v1.1)**

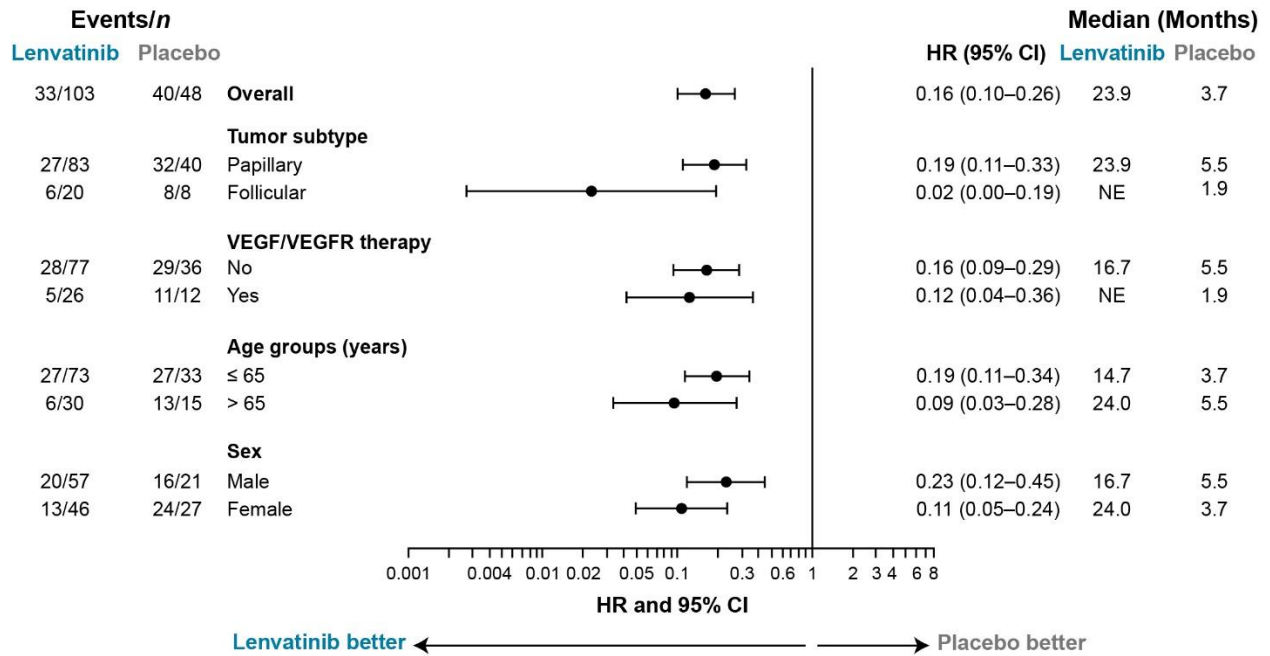

CI, confidence interval; HR, hazard ratio; IIR, independent imaging review; NE, not estimable; PFS, progression-free survival; RECIST v1.1, Response Evaluation Criteria In Solid Tumors version 1.1; VEGF(R), vascular endothelial growth factor (receptor).

Supplementary Figure S2. Kaplan–Meier plot of OS<sup>a</sup> (full analysis set)

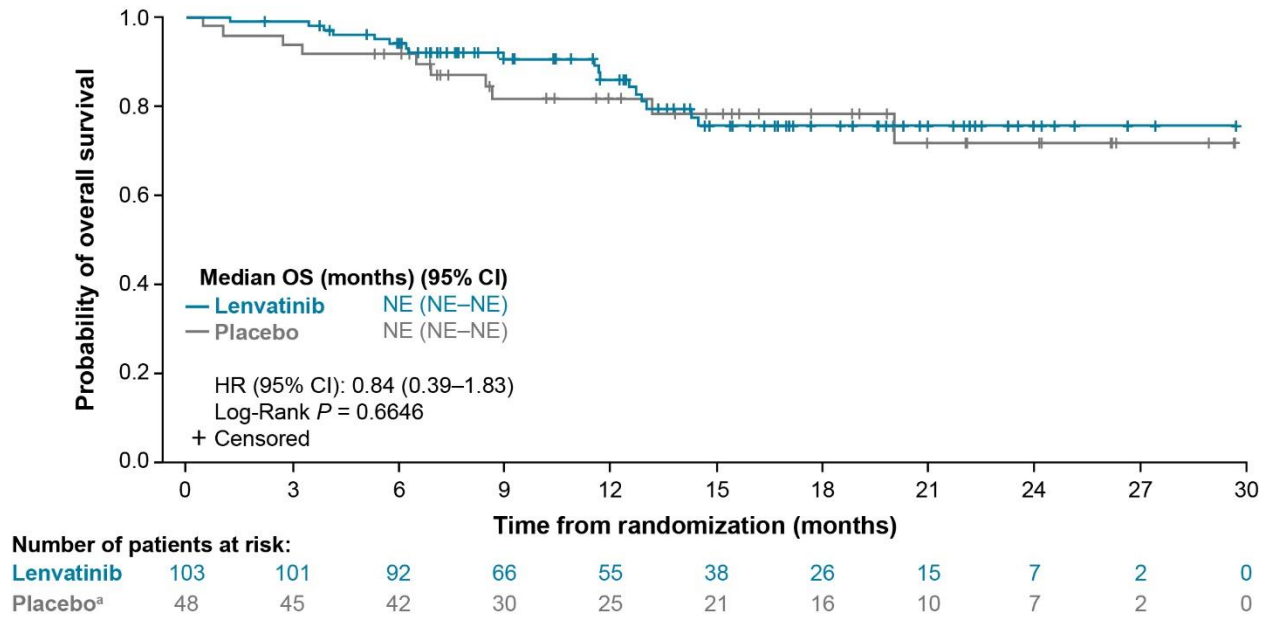

<sup>a</sup>The placebo group includes patients who received lenvatinib during the optional open-label phase.

CI, confidence interval; HR, hazard ratio; NE, not estimable; OS, overall survival.

Supplementary Figure S3. Kaplan–Meier plot of time to treatment failure

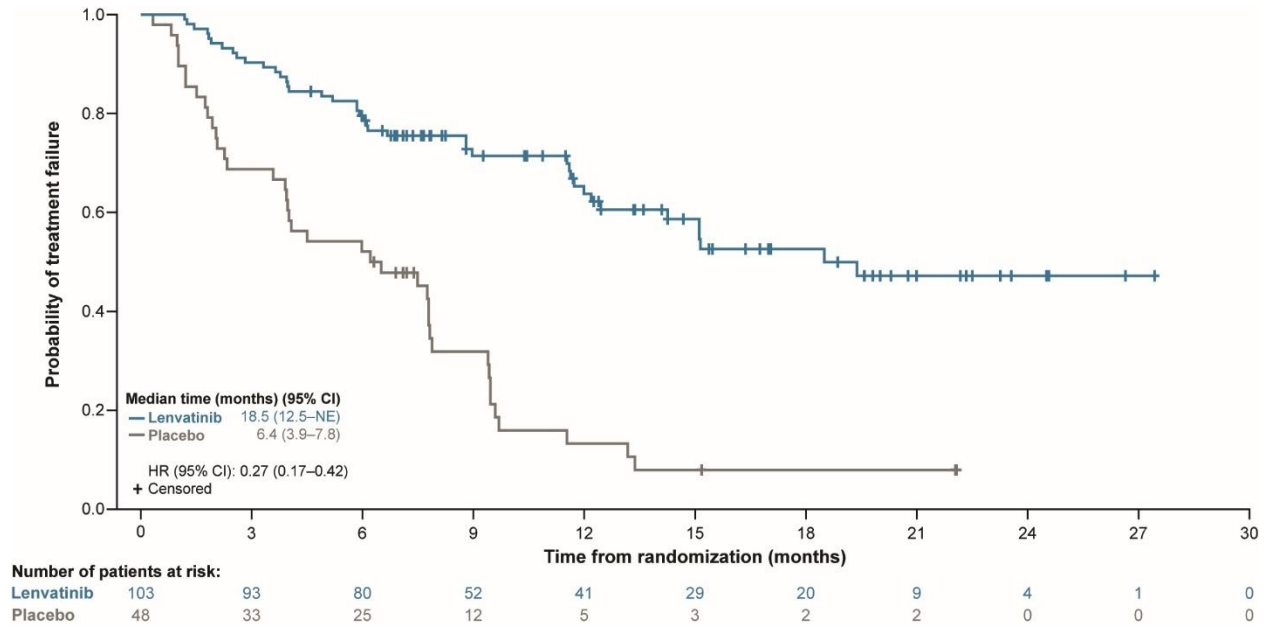

CI, confidence interval; HR, hazard ratio, NE, not estimable.
