# Supplementary figures and images for: A Randomized, Phase III Study of Lenvatinib in Chinese Patients with Radioiodine-Refractory Differentiated Thyroid Cancer
Source: PubMed Central journal article supplement — Clin Cancer Res. 2021 Jul 29;27(20):5502–9. doi: 10.1158/1078-0432.CCR-21-0761 (PMC9401493; doi:10.1158/1078-0432.ccr-21-0761), 2021-07-29

Supplementary Figure S1

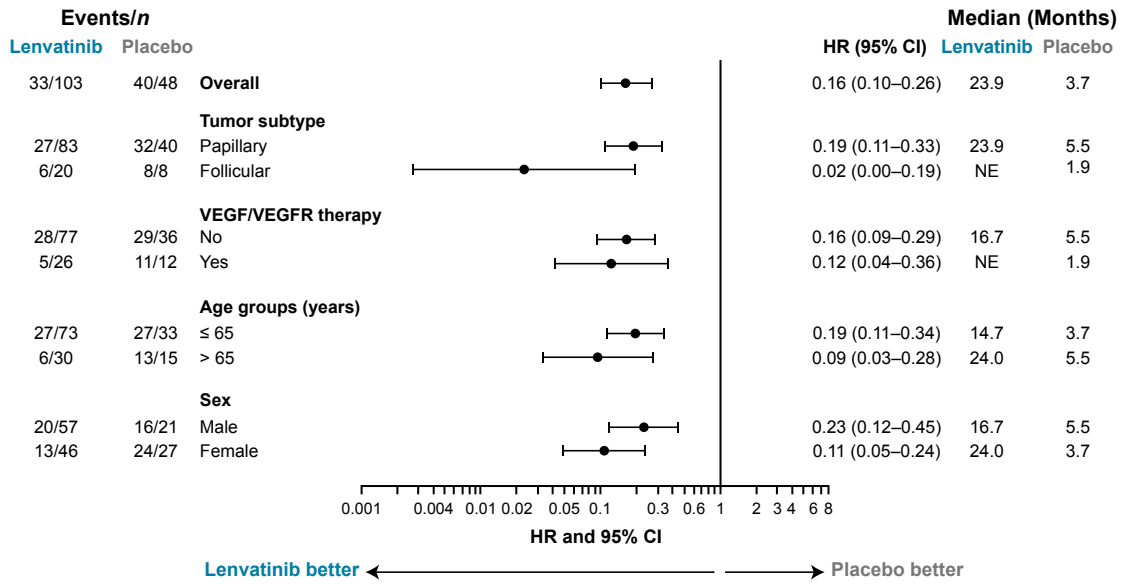

Supplement: 10780432ccr210761-sup-261465_3_supp_7278374_qwp2nt.pdf [file 10780432ccr210761-sup-261465_3_supp_7278374_qwp2nt.pdf]

Supplementary Figure S2

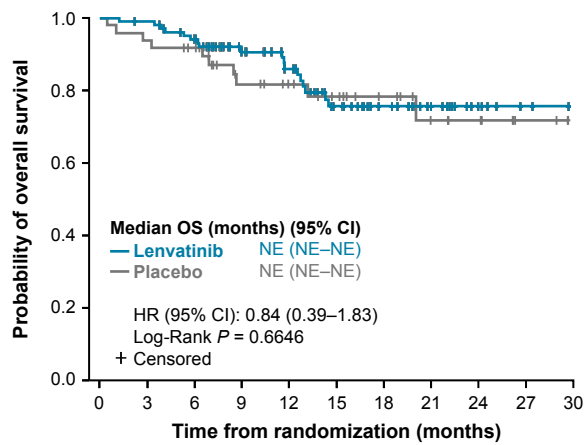

Number of patients at risk:

|                      |     |     |    |    |    |    |    |    |   |   |   |
|----------------------|-----|-----|----|----|----|----|----|----|---|---|---|
| Lenvatinib           | 103 | 101 | 92 | 66 | 55 | 38 | 26 | 15 | 7 | 2 | 0 |
| Placebo <sup>a</sup> | 48  | 45  | 42 | 30 | 25 | 21 | 16 | 10 | 7 | 2 | 0 |

Supplement: 10780432ccr210761-sup-261465_3_supp_7278375_qwp5nt.pdf [file 10780432ccr210761-sup-261465_3_supp_7278375_qwp5nt.pdf]

Supplementary Figure S3

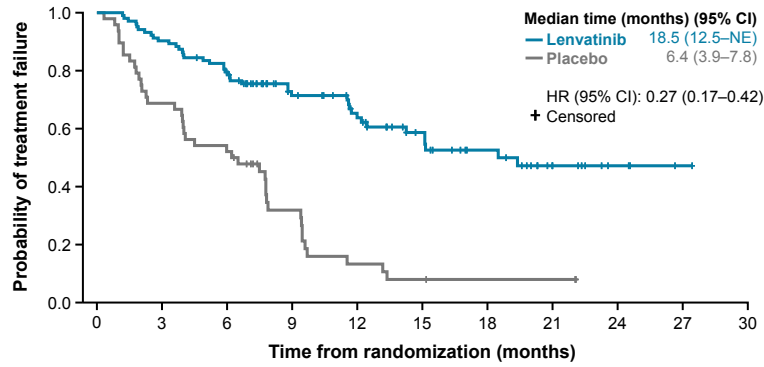

Number of patients at risk:

|                      |     |    |    |    |    |    |    |   |   |   |   |
|----------------------|-----|----|----|----|----|----|----|---|---|---|---|
| Lenvatinib           | 103 | 93 | 80 | 52 | 41 | 29 | 20 | 9 | 4 | 1 | 0 |
| Placebo <sup>a</sup> | 48  | 33 | 25 | 12 | 5  | 3  | 2  | 2 | 0 | 0 | 0 |

Supplement: 10780432ccr210761-sup-261465_3_supp_7278376_qwp4nt.pdf [file 10780432ccr210761-sup-261465_3_supp_7278376_qwp4nt.pdf]
